# Supplementary material for: Integrative Organelle-Based Functional Proteomics: In Silico Prediction of Impaired Functional Annotations in SACS KO Cell Model
Source: MDPI journal article supplement (doi:10.3390/biom12081024), 2022-07-24
Supplement: s1 [file s1]

## Supplementary Figure S1

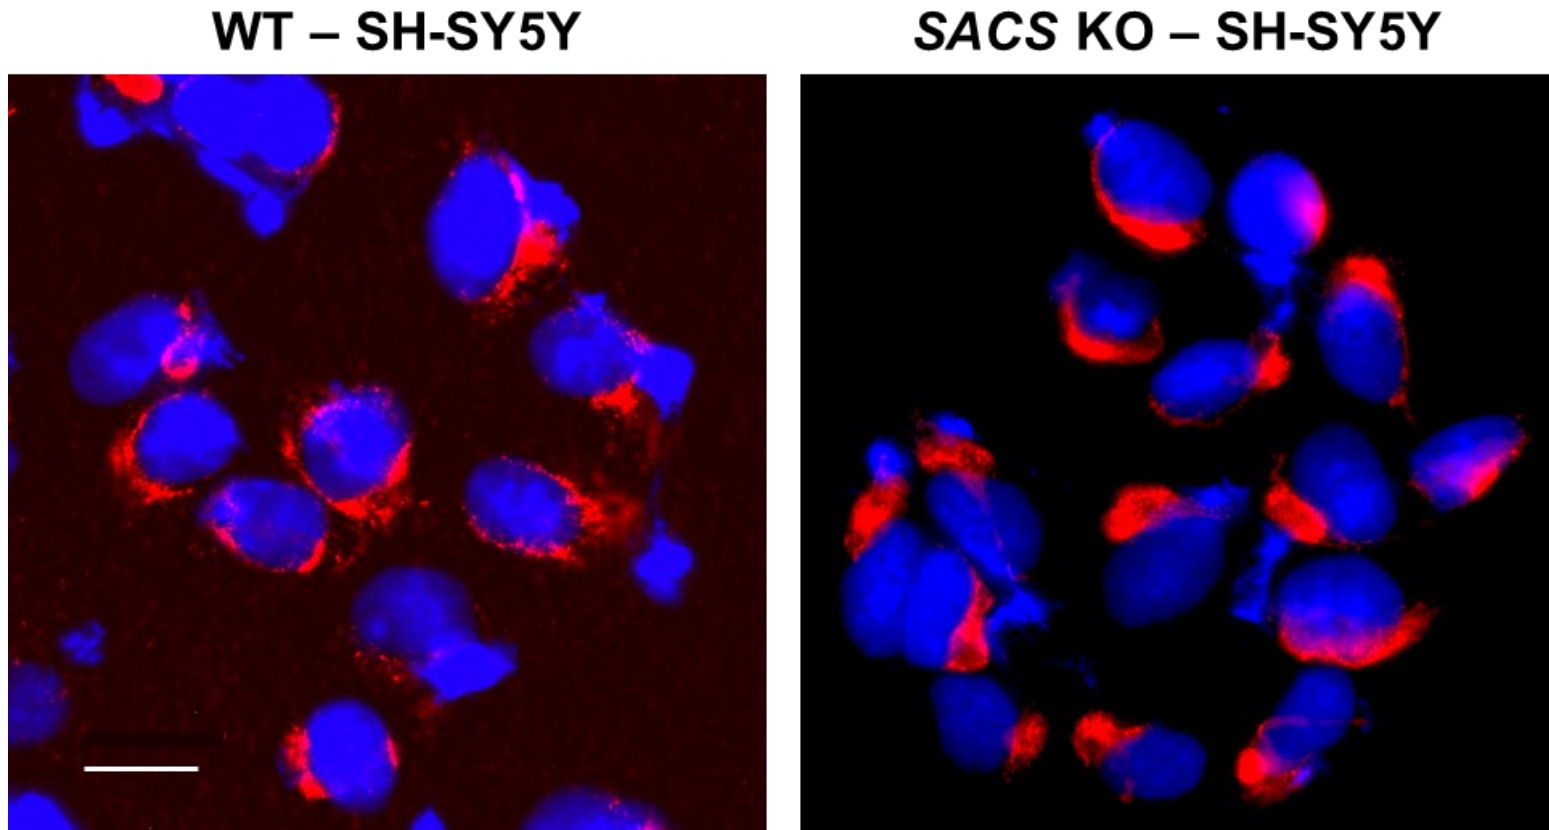

**Supplementary figure S1:** Representative images of vimentin network (in red) in WT and saccin KO cells showed a collapsed intermediate filament network in cells lacking saccin. DAPI (in blue) was used as nuclear stain. Scale bar = 10  $\mu$ m.
