# Supplementary material for: Integrative Organelle-Based Functional Proteomics: In Silico Prediction of Impaired Functional Annotations in SACS KO Cell Model
Source: Biomolecules. 2022 Jul 24;12(8):1024. doi: 10.3390/biom12081024 (PMC9331974; doi:10.3390/biom12081024)
Supplement: Supplementary file 1 [file biomolecules-12-01024-s001.zip › biomolecules-1788063-supplementary.xlsx]

## Sheet: Supplementary Table S1
Supplementary Table S1: Queried databases and criterias employed for compartimental localization of datasets
Scoring system for mitochondrial confidence.
Categories	Criteria	Assigned Score
Mito Evidence MitoCarta	True	1
Mito Evidence GO Annotation
	False	0
Mito Evidence Human Protein Atlas
Mass-Spec Experiments	MS ≥ 2	1
	MS < 2	0
GFP	-	Reported score
IMPI score
IMPI	Known NOT mitochondrial	0
	Predicted NOT mitochondrial	0
	Predicted mitochondrial	1
	Known mitochondrial	2
	Probable contaminant	0
Scoring system for lysosomal confidence.
Criteria	Categories	Assigned score
Found in SWATHTM data from bovine	SwissProt	2
	TrEMBL	1
Found in rat lysosomal proteome	Endo-Lysosomes (EL)	2
	Miscellaneous (Misc)	1
Found in hLGDB and mLGDB curated datasets	human/mouse	2
Found in UniProt Knowledgebase with a keyword "lysosome"; "autophagosome"; "autolysosome"; "endolysosome"	human/mouse	2
Found in compartments database (GO:0005764, lysosome)	confidence score >4 and <5	2
	confidence score >2 and <4	1

## Sheet: Supplementary Table S2
Supplementary Table S2: Proteomic dataset of mitochondrial DEPs in the cellular SACS KO model
Primary Accession	Symbol	Protein Name	Mito score	Log2 FC	p-value
P40763	STAT3	Signal transducer and activator of transcription 3	3.31888	2.5335	0.00116
Q9NYY8	FASTKD2	FAST kinase domain-containing protein 2, mitochondrial	7	1.61719	0.000189
P08238	HSP90AB1	Heat shock protein HSP 90-beta	3.98498	1.57857	1.67e-05
Q13724	MOGS	Mannosyl-oligosaccharide glucosidase	2.96499	1.18159	0.000155
Q9BYC2	OXCT2	Succinyl-CoA:3-ketoacid coenzyme A transferase 2, mitochondrial	4	1.1798	5.95e-05
P61978	HNRNPK	Heterogeneous nuclear ribonucleoprotein K	3.97727	1.1367	0.00143
Q9HD33	MRPL47	39S ribosomal protein L47, mitochondrial	7	1.09517	0.000599
P53007	SLC25A1	Tricarboxylate transport protein, mitochondrial	6	1.07205	0.00939
P49821	NDUFV1	NADH dehydrogenase [ubiquinone]flavoprotein 1, mitochondrial	7	1.00464	0.000195
P21397	MAOA	Amine oxidase [flavin-containing]A	7	0.986118	3.38e-06
Q9BXW7	HDHD5	Haloacid dehalogenase-like hydrolase domain-containing 5	7	0.907403	0.000583
P62263	RPS14	40S ribosomal protein S14	4.98164	0.843863	0.00109
Q9H2U2	PPA2	Inorganic pyrophosphatase 2, mitochondrial	7	0.818582	5.85e-05
P48449	LSS	Lanosterol synthase	2.95339	0.779128	7.08e-08
Q92665	MRPS31	28S ribosomal protein S31, mitochondrial	7	0.765418	0.00904
P09110	ACAA1	3-ketoacyl-CoA thiolase, peroxisomal	3.99735	0.734647	2.05e-07
O95292	VAPB	Vesicle-associated membrane protein-associated protein B/C	2.8181	0.720786	0.0381
P21399	ACO1	Cytoplasmic aconitate hydratase	3.60796	0.677291	2.22e-05
P49916	LIG3	DNA ligase 3	3.6463	0.640165	1.7e-05
P11310	ACADM	Medium-chain specific acyl-CoA dehydrogenase, mitochondrial	7	0.636756	3.59e-06
P51649	ALDH5A1	Succinate-semialdehyde dehydrogenase, mitochondrial	7	0.622324	1.68e-06
P39023	RPL3	60S ribosomal protein L3	2.99052	0.617757	0.018
Q12906	ILF3	Interleukin enhancer-binding factor 3	3.25502	0.614879	0.000337
P22695	UQCRC2	Cytochrome b-c1 complex subunit 2, mitochondrial	7	-0.590514	7.7e-08
P56556	NDUFA6	NADH dehydrogenase [ubiquinone]1 alpha subcomplex subunit 6	6	-0.593033	1.38e-05
O75208	COQ9	Ubiquinone biosynthesis protein COQ9, mitochondrial	6	-0.601916	0.0107
O95716	RAB3D	Ras-related protein Rab-3D	2.74354	-0.618529	0.00998
P23284	PPIB	Peptidyl-prolyl cis-trans isomerase B	2.95432	-0.633655	2.68e-06
Q9NRX2	MRPL17	39S ribosomal protein L17, mitochondrial	6	-0.637866	0.000109
P05141	SLC25A5	ADP/ATP translocase 2	7	-0.6399	4.3e-07
P12236	SLC25A4	ADP/ATP translocase 3	6.99266	-0.642923	1.56e-08
P14927	UQCRB	Cytochrome b-c1 complex subunit 7	6	-0.658239	5.68e-08
Q9Y4L1	HYOU1	Hypoxia up-regulated protein 1	2.98787	-0.663995	5.69e-05
O95182	NDUFA7	NADH dehydrogenase [ubiquinone]1 alpha subcomplex subunit 7	6	-0.667356	1.37e-05
O43852	CALU	Calumenin	2.8014	-0.67755	8.89e-08
P05387	RPLP2	60S acidic ribosomal protein P2	3.97174	-0.681451	1.37e-05
Q96BR5	COA7	Cytochrome c oxidase assembly factor 7	8	-0.690463	0.00012
Q9H0R6	QRSL1	Glutamyl-tRNA(Gln) amidotransferase subunit A, mitochondrial	6	-0.700147	0.000172
Q9Y5J7	TIMM9	Mitochondrial import inner membrane translocase subunit Tim9	7	-0.700822	4.82e-06
Q02338	BDH1	D-beta-hydroxybutyrate dehydrogenase, mitochondrial	7	-0.745016	3.15e-06
Q9Y3E5	PTRH2	Peptidyl-tRNA hydrolase 2, mitochondrial	7	-0.753595	1.12e-06
P00167	CYB5A	Cytochrome b5	4.97724	-0.753954	0.000846
Q5U5X0	LYRM7	Complex III assembly factor LYRM7	6	-0.767414	4.83e-05
P18859	ATP5PF	ATP synthase-coupling factor 6, mitochondrial	7	-0.818877	6.47e-05
P12532	SLC25A6	Creatine kinase U-type, mitochondrial	6	-0.821162	0.000585
A8MXV4	NUDT19	Nucleoside diphosphate-linked moiety X motif 19	5	-0.836663	7.96e-07
Q9NTJ5	SACM1L	Phosphatidylinositide phosphatase SAC1	2.88184	-0.870654	4.94e-07
P30049	ATP5F1D	ATP synthase subunit delta, mitochondrial	6	-0.879696	1.57e-06
P10515	DLAT	Dihydrolipoyllysine-residue acetyltransferase component of pyruvate dehydrogenase complex, mitochondrial	7	-0.885809	1.96e-10
O75438	NDUFB1	NADH dehydrogenase [ubiquinone]1 beta subcomplex subunit 1	6.97568	-0.893419	0.000547
Q9UJZ1	STOML2	Stomatin-like protein 2, mitochondrial	6	-0.961514	1.35e-09
P24752	ACAT1	Acetyl-CoA acetyltransferase, mitochondrial	7	-1.11188	2.77e-10
O14949	UQCRQ	Cytochrome b-c1 complex subunit 8	7	-1.15158	6.83e-05
Q14061	COX17	Cytochrome c oxidase copper chaperone	7	-2.07021	1.2e-10
Q6UXV4	APOOL	MICOS complex subunit MIC27	7	-2.35261	1.82e-05

## Sheet: Supplementary Table S3
Supplementary Table S3: Proteomic dataset of lysosomal DEPs in the cellular SACS KO model
Primary Accession	Symbol	Protein Name	Lyso score	Log2 FC	p-value
VPS16	Q9H269	VPS16 core subunit of CORVET and HOPS complexes	8	1.67263	0.000254682
STXBP2	Q15833	syntaxin binding protein 2	7	1.54038	8.76591e-06
ARPC5	O15511	actin related protein 2/3 complex subunit 5	4	1.415	1.83032e-07
QDPR	P09417	quinoid dihydropteridine reductase	3	1.34506	1.54947e-09
SCFD1	Q8WVM8	sec1 family domain containing 1	3	1.33612	4.01994e-09
TUFM	P49411	Tu translation elongation factor, mitochondrial	4	1.21371	4.88845e-07
PRDX5	P30044	peroxiredoxin 5	4	1.1928	2.21687e-08
ATP6V0A1	Q93050	ATPase H+ transporting V0 subunit a1	9	1.15746	3.73357e-05
WDR1	O75083	WD repeat domain 1	3	1.15184	7.16094e-14
RPS6KC1	Q96S38	ribosomal protein S6 kinase C1	4	1.08479	3.71176e-05
EPB41L2	O43491	erythrocyte membrane protein band 4.1 like 2	3	1.08434	0.00544637
SND1	Q7KZF4	staphylococcal nuclease and tudor domain containing 1	4	1.06971	9.37705e-12
ANK2	Q01484	ankyrin 2	3	1.04535	2.94651e-07
RPL10A	P62906	ribosomal protein L10a	4	1.0054	1.04803e-05
EPHB4	P54760	EPH receptor B4	3	0.995026	0.00016098
RAB12	Q6IQ22	RAB12, member RAS oncogene family	4	0.994278	1.41711e-06
ECE1	P42892	endothelin converting enzyme 1	6	0.993559	0.000784809
SCRIB	Q14160	scribble planar cell polarity protein	3	0.975276	0.00020173
CAPNS1	P04632	calpain small subunit 1	5	0.964502	3.54564e-05
CYFIP2	Q96F07	cytoplasmic FMR1 interacting protein 2	3	0.957594	3.15707e-06
VIM	P08670	vimentin	4	0.930999	0.000261437
PGAM1	P18669	phosphoglycerate mutase 1	4	0.88881	0.0377723
RPS3	P23396	ribosomal protein S3	4	0.887433	1.30746e-07
LMAN1	P49257	lectin, mannose binding 1	3	0.885424	7.27242e-05
CDC42	P60953	cell division cycle 42	3	0.867051	0.0305787
DSG3	P32926	desmoglein 3	3	0.839512	1.04496e-05
MYO1C	O00159	myosin IC	5	0.837951	6.18779e-06
HNRNPK	P61978	heterogeneous nuclear ribonucleoprotein K	4	0.831009	4.40462e-08
SNAP23	O00161	synaptosome associated protein 23	7	0.828818	0.000112955
HSPB1	P04792	heat shock protein family B (small) member 1	4	0.823375	2.03828e-07
RAB2B	Q8WUD1	RAB2B, member RAS oncogene family	3	0.794646	5.11373e-10
DNAJC3	Q13217	DnaJ heat shock protein family (Hsp40) member C3	5	0.788666	1.22539e-06
RAB4A	P20338	RAB4A, member RAS oncogene family	4	0.768398	1.88537e-06
MSN	P26038	moesin	4	0.764921	2.55577e-06
YBX1	P67809	Y-box binding protein 1	3	0.708776	0.000302345
STMN1	P16949	stathmin 1	4	0.684439	0.00095263
ACE	P12821	angiotensin I converting enzyme	4	0.670872	2.30897e-07
HNRNPA2B1	P22626	heterogeneous nuclear ribonucleoprotein A2/B1	5	0.666386	0.000360784
ATP2A2	P16615	ATPase sarcoplasmic/endoplasmic reticulum Ca2+ transporting 2	3	0.655974	0.00509313
NCKAP1	Q9Y2A7	NCK associated protein 1	3	0.650284	0.000106994
CTNND1	O60716	catenin delta 1	4	0.645361	4.14053e-05
FH	P07954	fumarate hydratase	3	0.636412	0.000131593
DYNC1H1	Q14204	dynein cytoplasmic 1 heavy chain 1	5	0.627683	6.34767e-09
MDH2	P40926	malate dehydrogenase 2	4	0.624281	7.97558e-11
SRC	P12931	SRC proto-oncogene, non-receptor tyrosine kinase	5	0.619566	3.04954e-06
EHD1	Q9H4M9	EH domain containing 1	6	0.615771	1.52329e-08
TLN1	Q9Y490	talin 1	4	0.61471	1.27279e-05
VASP	P50552	vasodilator stimulated phosphoprotein	4	0.596158	4.43942e-05
AP2A2	O94973	adaptor related protein complex 2 subunit alpha 2	6	0.592084	0.00204357
SLC25A3	Q00325	solute carrier family 25 member 3	4	0.585181	2.3328e-12
RAB14	P61106	RAB14, member RAS oncogene family	9	0.584374	0.000936634
SHMT2	P34897	Serine hydroxymethyltransferase, mitochondrial	4	0.577622	7.981e-07
GNG2	P59768	Guanine nucleotide-binding protein G(I)/G(S)/G(O) subunit gamma-2	4	-0.579061	9.1013e-08
PI4K2A	Q9BTU6	phosphatidylinositol 4-kinase type 2 alpha	8	-0.599981	0.025194
ARF3	P61204	ADP ribosylation factor 3	5	-0.60125	0.000247586
PDIA3	P30101	protein disulfide isomerase family A member 3	4	-0.603432	7.54118e-05
ANXA6	P08133	annexin A6	7	-0.603542	7.98806e-07
ATP1B3	P54709	ATPase Na+/K+ transporting subunit beta 3	4	-0.616226	0.00145365
LDHB	P07195	lactate dehydrogenase B	4	-0.622324	0.000325177
RAB5B	P61020	RAB5B, member RAS oncogene family	5	-0.632487	4.7615e-06
ACTG1	P63261	actin gamma 1	4	-0.644617	0.00054821
BLOC1S2	Q6QNY1	biogenesis of lysosomal organelles complex 1 subunit 2	5	-0.656376	0.0101764
LNPEP	Q9UIQ6	leucyl and cystinyl aminopeptidase	7	-0.6715	5.96057e-05
BSG	P35613	basigin (Ok blood group)	3	-0.682716	0.000757437
CANX	P27824	calnexin	3	-0.686396	1.60435e-05
CALR	P27797	calreticulin	5	-0.695464	1.53788e-05
DDX3X	O00571	DEAD-box helicase 3 X-linked	4	-0.717073	3.65011e-06
RAB3D	O95716	RAB3D, member RAS oncogene family	4	-0.740431	3.68328e-06
PRKCA	P17252	protein kinase C alpha	3	-0.742084	8.42242e-09
HYOU1	Q9Y4L1	hypoxia up-regulated 1	3	-0.74231	7.70038e-08
SCAMP1	O15126	secretory carrier membrane protein 1	4	-0.743407	0.00786725
ENDOD1	O94919	endonuclease domain containing 1	3	-0.747584	3.75277e-06
RAB7A	P51149	RAB7A, member RAS oncogene family	9	-0.752748	5.54163e-08
APP	P05067	amyloid beta precursor protein	5	-0.769938	3.88817e-05
B2M	P61769	beta-2-microglobulin	4	-0.771872	4.6641e-05
SLC9A3R1	O14745	SLC9A3 regulator 1	4	-0.793625	3.18293e-05
HSPA5	P11021	heat shock protein family A (Hsp70) member 5	4	-0.824044	6.31856e-07
ARHGDIA	P52565	Rho GDP dissociation inhibitor alpha	4	-0.827787	9.46508e-05
ANXA11	P50995	annexin A11	6	-0.833475	8.70083e-06
LMAN2	Q12907	lectin, mannose binding 2	3	-0.838875	9.52699e-05
CFL1	P23528	cofilin 1	3	-0.841121	2.85633e-07
YWHAB	P31946	tyrosine 3-monooxygenase/tryptophan 5-monooxygenase activation protein beta	4	-0.845878	0.00150332
CAPZA1	P52907	capping actin protein of muscle Z-line subunit alpha 1	4	-0.84812	5.34747e-09
PDGFRB	P09619	platelet derived growth factor receptor beta	4	-0.850917	1.21614e-08
ACTR3	P61158	actin related protein 3	4	-0.853701	2.8418e-10
ALCAM	Q13740	activated leukocyte cell adhesion molecule	3	-0.884601	3.19154e-05
SLC1A5	Q15758	solute carrier family 1 member 5	4	-0.893152	5.43589e-06
SLC7A5	Q01650	solute carrier family 7 member 5	3	-0.925772	8.9828e-09
GOT1	P17174	glutamic-oxaloacetic transaminase 1	4	-0.931843	0.00032103
VAPA	Q9P0L0	VAMP associated protein A	5	-0.932287	0.00244778
PARK7	Q99497	Parkinsonism associated deglycase	5	-0.956665	5.93067e-05
RALA	P11233	RAS like proto-oncogene A	3	-0.974131	0.000327867
SNX3	O60493	sorting nexin 3	4	-0.983076	1.179e-05
FLOT2	Q14254	flotillin 2	6	-0.999055	2.02963e-09
ATP6V1A	P38606	ATPase H+ transporting V1 subunit A	10	-1.12153	1.12602e-05
ATP6V1E1	P36543	ATPase H+ transporting V1 subunit E1	10	-1.22363	3.81942e-07
NSF	P46459	N-ethylmaleimide sensitive factor, vesicle fusing ATPase	5	-1.30807	8.7917e-08
RAB3A	P20336	RAB3A, member RAS oncogene family	3	-1.81859	1.24665e-06

## Sheet: Supplementary Table S4
Supplementary Table S4: Mitochondria-associated differentially regulated IDs identified in transcriptomic and proteomic studies.
Symbol	Entrez Gene Name	Accession	Entrez gene	protein		gene
				p value	log2 FC	p value	log2 FC
ACAA1	acetyl-CoA acyltransferase 1	P09110	ENSG00000060971	2.05e-07	0.735	0.00951	0.658
ACAT1	acetyl-CoA acetyltransferase 1	P24752	ENSG00000075239	2.77e-10	-1.112	5.04e-06	-0.887
ACO1	aconitase 1	P21399	ENSG00000122729	2.22e-05	0.677	0.00534	0.917
ALDH5A1	aldehyde dehydrogenase 5 family member A1	P51649	ENSG00000112294	1.68e-06	0.622	1.47e-05	1.157
APOOL	apolipoprotein O like	Q6UXV4	ENSG00000155008	1.82e-05	-2.353	0.0127	-0.774
ATP5F1D	ATP synthase F1 subunit delta	P30049	ENSG00000099624	1.57e-06	-0.88	0.0285	0.618
ATP5PF	ATP synthase peripheral stalk subunit F6	P18859	ENSG00000154723	6.47e-05	-0.819	4.01e-06	0.968
CALU	calumenin	O43852	ENSG00000128595	8.89e-08	-0.678	2.01e-10	-1.328
HDHD5	haloacid dehalogenase like hydrolase domain containing 5	Q9BXW7	ENSG00000069998	0.000583	0.907	3.14e-06	1.189
HSP90AB1	heat shock protein 90 alpha family class B member 1	P08238	ENSG00000096384	1.67e-05	1.579	0.000474	0.674
HYOU1	hypoxia up-regulated 1	Q9Y4L1	ENSG00000149428	5.69e-05	-0.664	3.53e-101	-3.564
ILF3	interleukin enhancer binding factor 3	Q12906	ENSG00000129351	0.000337	0.615	3.48e-09	1.092
LIG3	DNA ligase 3	P49916	ENSG00000005156	1.7e-05	0.64	4.17e-06	0.896
LSS	lanosterol synthase	P48449	ENSG00000160285	7.08e-08	0.779	1.78e-11	1.472
LYRM7	LYR motif containing 7	Q5U5X0	ENSG00000186687	4.83e-05	-0.767	0.00514	-0.91
MAOA	monoamine oxidase A	P21397	ENSG00000189221	3.38e-06	0.986	4.12e-33	2.499
MRPL17	mitochondrial ribosomal protein L17	Q9NRX2	ENSG00000158042	0.000109	-0.638	3.11e-05	0.829
NDUFA6	NADH:ubiquinone oxidoreductase subunit A6	P56556	ENSG00000184983	1.38e-05	-0.593	1.11e-10	1.345
NDUFV1	NADH:ubiquinone oxidoreductase core subunit V1	P49821	ENSG00000167792	0.000195	1.005	0.000978	0.883
PPIB	peptidylprolyl isomerase B	P23284	ENSG00000166794	2.68e-06	-0.634	0.00013	-0.837
RAB3D	RAB3D, member RAS oncogene family	O95716	ENSG00000105514	0.00998	-0.619	0.000164	-0.778
RPLP2	ribosomal protein lateral stalk subunit P2	P05387	ENSG00000177600	1.37e-05	-0.681	0.00454	0.682
SACM1L	SAC1 like phosphatidylinositide phosphatase	Q9NTJ5	ENSG00000211456	4.94e-07	-0.871	0.029	-0.731
SLC25A1	solute carrier family 25 member 1	P53007	ENSG00000100075	0.00939	1.072	0.00169	0.883
TIMM9	translocase of inner mitochondrial membrane 9	Q9Y5J7	ENSG00000100575	4.82e-06	-0.701	1.37e-08	-1.289
UQCRQ	ubiquinol-cytochrome c reductase complex III subunit VII	O14949	ENSG00000164405	6.83e-05	-1.152	1.23e-05	0.98

## Sheet: Supplementary Table S5
Supplementary Table S5: Lysosomal-associated differentially regulated IDs identified in transcriptomic and proteomic studies.
Symbol	Entrez Gene Name	Accession	Entrez gene	protein		gene
				p value	log2 FC	p value	log2 FC
ALCAM	activated leukocyte cell adhesion molecule	Q13740	ENSG00000170017	3.19e-05	-0.885	1.77e-08	-1.53
ARHGDIA	Rho GDP dissociation inhibitor alpha	P52565	ENSG00000141522	9.47e-05	-0.828	2.83e-12	1.573
ARPC5	actin related protein 2/3 complex subunit 5	O15511	ENSG00000162704	1.83e-07	1.415	4.83e-11	1.111
ATP2A2	ATPase sarcoplasmic/endoplasmic reticulum Ca2+ transporting 2	P16615	ENSG00000174437	0.00509	0.656	1.54e-13	-1.261
ATP6V0A1	ATPase H+ transporting V0 subunit a1	Q93050	ENSG00000033627	3.73e-05	1.157	0.000633	-0.645
B2M	beta-2-microglobulin	P61769	ENSG00000273686	4.66e-05	-0.772	1.58e-12	-1.258
CALR	calreticulin	P27797	ENSG00000179218	1.54e-05	-0.695	3.3e-29	-1.906
CANX	calnexin	P27824	ENSG00000127022	1.6e-05	-0.686	4.46e-33	-2.235
CAPNS1	calpain small subunit 1	P04632	ENSG00000126247	3.55e-05	0.965	5.55e-06	0.953
CFL1	cofilin 1	P23528	ENSG00000172757	2.86e-07	-0.841	5.35e-16	1.748
CYFIP2	cytoplasmic FMR1 interacting protein 2	Q96F07	ENSG00000055163	3.16e-06	0.958	5.33e-08	0.984
DNAJC3	DnaJ heat shock protein family (Hsp40) member C3	Q13217	ENSG00000102580	1.23e-06	0.789	6.11e-32	-3.523
EPHB4	EPH receptor B4	P54760	ENSG00000196411	0.000161	0.995	1.4e-23	1.951
FH	fumarate hydratase	P07954	ENSG00000091483	0.000132	0.636	0.00229	0.665
FLOT2	flotillin 2	Q14254	ENSG00000132589	2.03e-09	-0.999	1.41e-05	0.891
GOT1	glutamic-oxaloacetic transaminase 1	P17174	ENSG00000120053	0.000321	-0.932	4.73e-05	-0.955
HNRNPA2B1	heterogeneous nuclear ribonucleoprotein A2/B1	P22626	ENSG00000122566	0.000361	0.666	8.12e-15	1.473
HSPA5	heat shock protein family A (Hsp70) member 5	P11021	ENSG00000044574	6.32e-07	-0.824	3.65e-59	-3.749
HSPB1	heat shock protein family B (small) member 1	P04792	ENSG00000106211	2.04e-07	0.823	1.27e-17	1.97
HYOU1	hypoxia up-regulated 1	Q9Y4L1	ENSG00000149428	7.7e-08	-0.742	1.35e-104	-3.564
KRT8	keratin 8	#N/A	ENSG00000170421	4.34e-05	1.556	8.64e-27	-3.779
LMAN1	lectin, mannose binding 1	P49257	ENSG00000074695	7.27e-05	0.885	1.76e-22	-2.759
LNPEP	leucyl and cystinyl aminopeptidase	Q9UIQ6	ENSG00000113441	5.96e-05	-0.672	1.51e-06	-1.25
MDH2	malate dehydrogenase 2	P40926	ENSG00000146701	7.98e-11	0.624	0.000136	0.815
MSN	moesin	P26038	ENSG00000147065	2.56e-06	0.765	1.58e-55	5.753
NCKAP1	NCK associated protein 1	Q9Y2A7	ENSG00000061676	0.000107	0.65	0.000359	-0.979
PARK7	Parkinsonism associated deglycase	Q99497	ENSG00000116288	5.93e-05	-0.957	2.17e-05	0.745
PDGFRB	platelet derived growth factor receptor beta	P09619	ENSG00000113721	1.22e-08	-0.851	0.000736	-0.661
PDIA3	protein disulfide isomerase family A member 3	P30101	ENSG00000167004	7.54e-05	-0.603	5.23e-28	-1.798
PGAM1	phosphoglycerate mutase 1	P18669	ENSG00000171314	0.0378	0.889	1.78e-15	1.59
PRDX5	peroxiredoxin 5	P30044	ENSG00000126432	2.22e-08	1.193	0.00594	0.594
PRKCA	protein kinase C alpha	P17252	ENSG00000154229	8.42e-09	-0.742	0.00224	-0.59
QDPR	quinoid dihydropteridine reductase	P09417	ENSG00000151552	1.55e-09	1.345	3.58e-06	0.854
RAB12	RAB12, member RAS oncogene family	Q6IQ22	ENSG00000206418	1.42e-06	0.994	1.86e-07	-1.234
RAB3D	RAB3D, member RAS oncogene family	O95716	ENSG00000105514	3.68e-06	-0.74	2.73e-05	-0.778
RAB5B	RAB5B, member RAS oncogene family	P61020	ENSG00000111540	4.76e-06	-0.632	8.43e-05	-0.624
RALA	RAS like proto-oncogene A	P11233	ENSG00000006451	0.000328	-0.974	2.3e-05	-0.922
RPS6KC1	ribosomal protein S6 kinase C1	Q96S38	ENSG00000136643	3.71e-05	1.085	4.85e-06	-1.168
SCAMP1	secretory carrier membrane protein 1	O15126	ENSG00000085365	0.00787	-0.743	8.35e-05	-1.081
SCFD1	sec1 family domain containing 1	Q8WVM8	ENSG00000092108	4.02e-09	1.336	6.14e-10	-1.663
SCRIB	scribble planar cell polarity protein	Q14160	ENSG00000274287	0.000202	0.975	5.24e-10	1.257
SLC1A5	solute carrier family 1 member 5	Q15758	ENSG00000105281	5.44e-06	-0.893	0.00117	-0.695
SLC25A3	solute carrier family 25 member 3	Q00325	ENSG00000075415	2.33e-12	0.585	0.00123	0.633
SND1	staphylococcal nuclease and tudor domain containing 1	Q7KZF4	ENSG00000197157	9.38e-12	1.07	2.45e-08	-1.044
SRC	SRC proto-oncogene, non-receptor tyrosine kinase	P12931	ENSG00000197122	3.05e-06	0.62	1.19e-07	1.054
STMN1	stathmin 1	P16949	ENSG00000117632	0.000953	0.684	3.94e-12	1.162
STXBP2	syntaxin binding protein 2	Q15833	ENSG00000076944	8.77e-06	1.54	1.67e-11	-2.822
VAPA	VAMP associated protein A	Q9P0L0	ENSG00000101558	0.00245	-0.932	0.000955	-0.634
VPS16	VPS16 core subunit of CORVET and HOPS complexes	Q9H269	ENSG00000215305	0.000255	1.673	3.06e-10	1.462
WDR1	WD repeat domain 1	O75083	ENSG00000071127	7.16e-14	1.152	7.11e-05	0.743
YBX1	Y-box binding protein 1	P67809	ENSG00000065978	0.000302	0.709	0.00032	0.648

## Sheet: Supplementary Table S6
Supplementary Table S6: Druggability of common proteins/genes across the omic studies
Symbol	Entrez Gene Name	Type	Drugs
ALDH5A1	aldehyde dehydrogenase 5 family member A1	enzyme	theophylline/tretinoin/valproic acid, valproic acid
HSP90AB1	heat shock protein 90 alpha family class B member 1	enzyme	cisplatin, retaspimycin, alvespimycin, TAS-116
LSS	lanosterol synthase	enzyme	oxiconazole
MAOA	monoamine oxidase A	enzyme	fenfluramine/phentermine, moclobemide, methamphetamine, isocarboxazid, CX-1370, benzphetamine, phentermine/topiramate, N-(2-indanyl)glycinamide, iproniazid, phentermine, tranylcypromine, procainamide, MAO-A inhibitor, ladostigil, phenelzine, dextroamphetamine
ALCAM	activated leukocyte cell adhesion molecule	other	praluzatamab ravtansine
B2M	beta-2-microglobulin	transmembrane receptor	4'-iodo-4'-deoxydoxorubicin
EPHB4	EPH receptor B4	kinase	tesevatinib, JI 101, AZ12672857, NVP-BHG712
HSPA5	heat shock protein family A (Hsp70) member 5	enzyme	SHetA2, PAT-SM6
PDGFRB	platelet derived growth factor receptor beta	kinase	midostaurin, filgrastim/imatinib, PDGF receptor tyrosine kinase inhibitor V, sorafenib/sulindac/sunitinib, cytarabine/idarubicin/midostaurin, imatinib/sunitinib, bevacizumab/sorafenib, axitinib, cytarabine/imatinib/methotrexate, 5-azacytidine/sorafenib, tandutinib, pazopanib, JI 101, dasatinib/nilotinib, dasatinib/erlotinib, telatinib, imatinib, imatinib/rituximab, becaplermin, afatinib/dasatinib…
PRDX5	peroxiredoxin 5	enzyme	auranofin
PRKCA	protein kinase C alpha	kinase	aprinocarsen, Go6983, L-threo-safingol, Go 6976, Ro31-8220, ingenol mebutate, midostaurin
QDPR	quinoid dihydropteridine reductase	enzyme
SRC	SRC proto-oncogene, non-receptor tyrosine kinase	kinase	bosutinib/corticosteroid, PP-121, tirbanibulin, CGP77675, WH-4-025, ZM 306416, SI163, corticosteroid/dasatinib, XL999, AZ12672857, dasatinib/nilotinib, dasatinib/erlotinib, PD173955, S7, AZM-475271, saracatinib, bosutinib/dexamethasone/vincristine, KX02, afatinib/dasatinib, blinatumomab/dasatinib, bosutinib/rituximab, S29, PD162531, dasatinib/dexamethasone/vincristine, SM1-71, dasatinib/dexametha…
